# Supplementary material for: BNP facilitates NMB-encoded histaminergic itch via NPRC-NMBR crosstalk
Source: eLife journal article supplement (doi:10.7554/elife.71689), 2021-12-17
Supplement: supp [file elife-71689-supp-v1.zip]

Figure 6-figure supplement 1

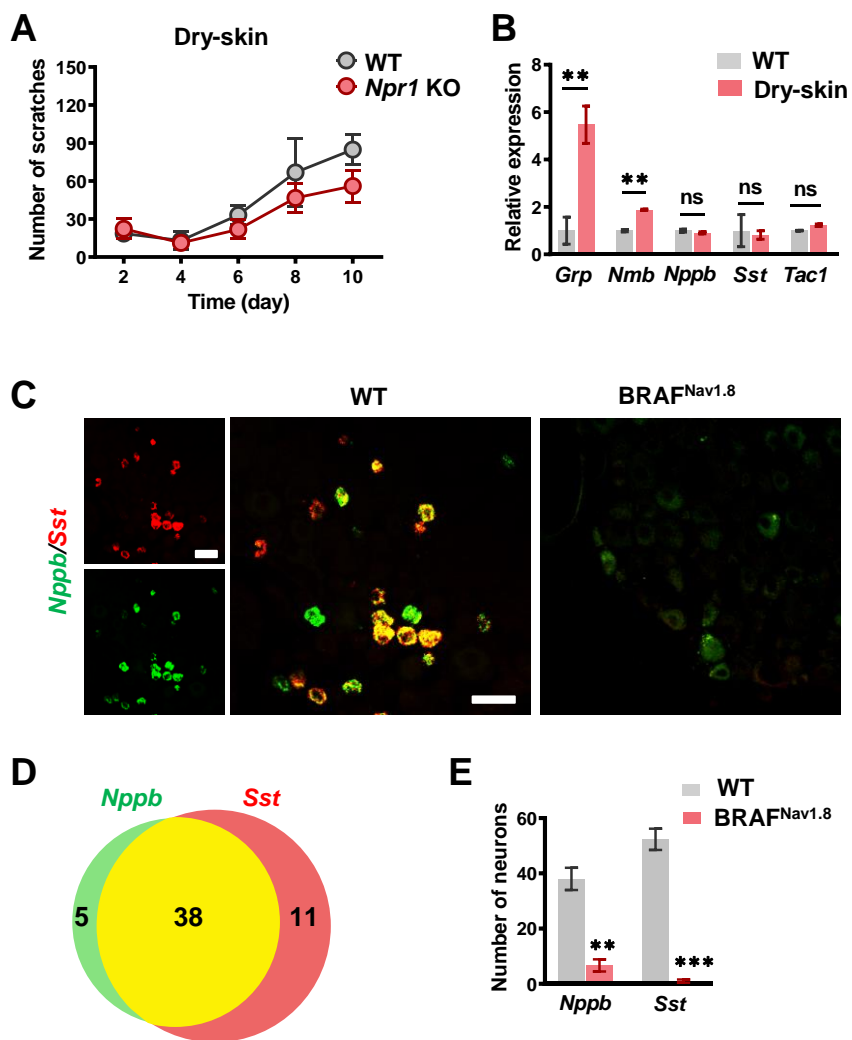

**Figure 6-figure supplement 1: BNP-NPRA signaling is dispensable for**

**nonhistaminergic itch and neuropathic itch.** **A**, *Npr1* KO mice and WT littermates showed comparable spontaneous scratching behaviors in the dry skin model.  $n = 6$ ,  $P = 0.1283$ ,  $F_{1,50} = 2.392$ , repeated measures Two-way ANOVA. **B**, Real-time RT PCR showing significantly reduced levels of *Grp*, *Nmb*, *Nppb*, *Sst* and *Tac1* in DRGs of dry skin mice relative to WT mice.  $n = 4$ . **C**, RNA scope ISH images showing that *Nppb* and *Sst* were largely co-expressed in WT DRG neurons. *Nppb* and *Sst* signals were dramatically reduced in DRGs of BRAF<sup>Nav1.8</sup> mice. **D**, Venn diagram showing overlapping expression of *Nppb* and *Sst*. **E**, Quantified data of RNA scope showing that the numbers of *Nppb* neurons and *Sst* neurons were significantly reduced in the DRGs of BRAF<sup>Nav1.8</sup> mice.  $n = 4$ . Values are presented as mean  $\pm$  SEM. \*\* $P < 0.01$ , \*\*\* $P < 0.001$ , unpaired t test. Scale bars, 50  $\mu$ m.
