# Supplementary material for: BNP facilitates NMB-encoded histaminergic itch via NPRC-NMBR crosstalk
Source: eLife journal article supplement (doi:10.7554/elife.71689), 2021-12-17
Supplement: supp [file elife-71689-supp-v1.zip]

Archive with 16 entries (16 files):
- elife_poa_e71689_Transparent_Reporting_File.docx
- elife_poa_e71689_Figure_1_figure_supplement_1.pdf
- elife_poa_e71689_Figure_1_figure_supplement_2.pdf
- elife_poa_e71689_Figure_4_figure_supplement_1.pdf
- elife_poa_e71689_Figure_6_figure_supplement_1.pdf
- elife_poa_e71689_Figure_6_video_1.mov
- elife_poa_e71689_Figure_7_figure_supplement_1.pdf
- elife_poa_e71689_Figure_1_source_data_1.xlsx
- elife_poa_e71689_Figure_1_figure_supplement_1_source_data_1.xlsx
- elife_poa_e71689_Figure_1_figure_supplement_2_source_data_1.xlsx
- elife_poa_e71689_Figure_2_source_data_1.xlsx
- elife_poa_e71689_Figure_3_source_data_1.xlsx
- elife_poa_e71689_Figure_4_source_data_1.xlsx
- elife_poa_e71689_Figure_5_source_data_1.xlsx
- elife_poa_e71689_Figure_6_source_data_1.xlsx
- elife_poa_e71689_Figure_6_figure_supplement_1_source_data_1.xlsx
