# Supplementary material for: BNP facilitates NMB-encoded histaminergic itch via NPRC-NMBR crosstalk
Source: eLife journal article supplement (doi:10.7554/elife.71689), 2021-12-17
Supplement: supp [file elife-71689-supp-v1.zip › elife_poa_e71689_Figure_1_figure_supplement_1.pdf]

**Figure 1-figure supplement 1**

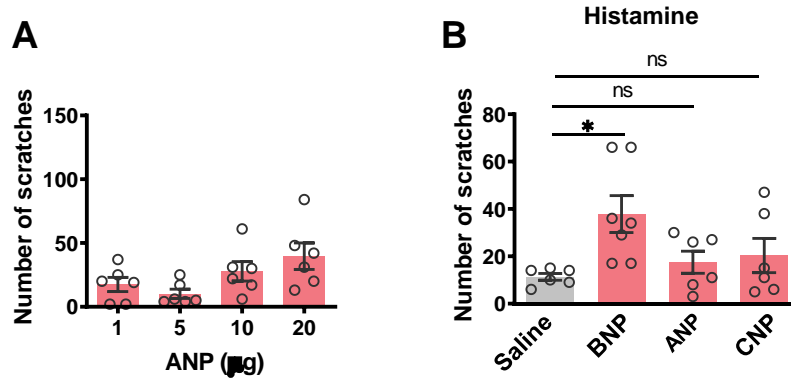

**Figure 1-figure supplement 1: Failure of ANP and CNP in facilitating histamine itch.** **A**, ANP 1 ~ 20 µg, (equivalent to 6 -120 µM, i.t.) failed to induce robust scratching behaviors in mice. n = 6. **B**, Only BNP (30 µM, i.t.) facilitated histamine itch. Note that neither ANP (60 µM, i.t.) nor CNP (60 µM, i.t.) exhibited facilitatory effect. n = 6 - 7. \**P* < 0.05, \*\*\**P* < 0.001, one-way ANOVA followed by Dunnett's test. Values are presented as mean ± SEM.
