# Supplementary material for: BNP facilitates NMB-encoded histaminergic itch via NPRC-NMBR crosstalk
Source: eLife journal article supplement (doi:10.7554/elife.71689), 2021-12-17
Supplement: supp [file elife-71689-supp-v1.zip › elife_poa_e71689_Figure_1_figure_supplement_1_source_data_1.xlsx]

## Sheet: Sheet1
Figure 1-figure supplement 1A ANP 1 ~ 20 µg, (equivalent to 6 -120 µM, i.t.) failed to induce robust scratching behaviors in mice.
	ANP (μg)
	1	5	10	20
Number of scratches	37	17	6	20
	2	4	17	48
	20	6	61	31
	2	25	31	13
	25	5	30	84
	19	4	22	42
Figure 1-figure supplement 1A Only BNP (30 µM, i.t.) facilitated histamine itch.
	Histamine
	Saline	BNP	ANP	CNP
Number of scratches	9	29	26	15
	14	36	27	47
	10	66	11	6
	6	17	30	5
	15	66	3	38
	14	17	8	11
		34
