# Supplementary material for: BNP facilitates NMB-encoded histaminergic itch via NPRC-NMBR crosstalk
Source: eLife journal article supplement (doi:10.7554/elife.71689), 2021-12-17
Supplement: supp [file elife-71689-supp-v1.zip › elife_poa_e71689_Figure_1_figure_supplement_2.pdf]

Figure 1-figure supplement 2

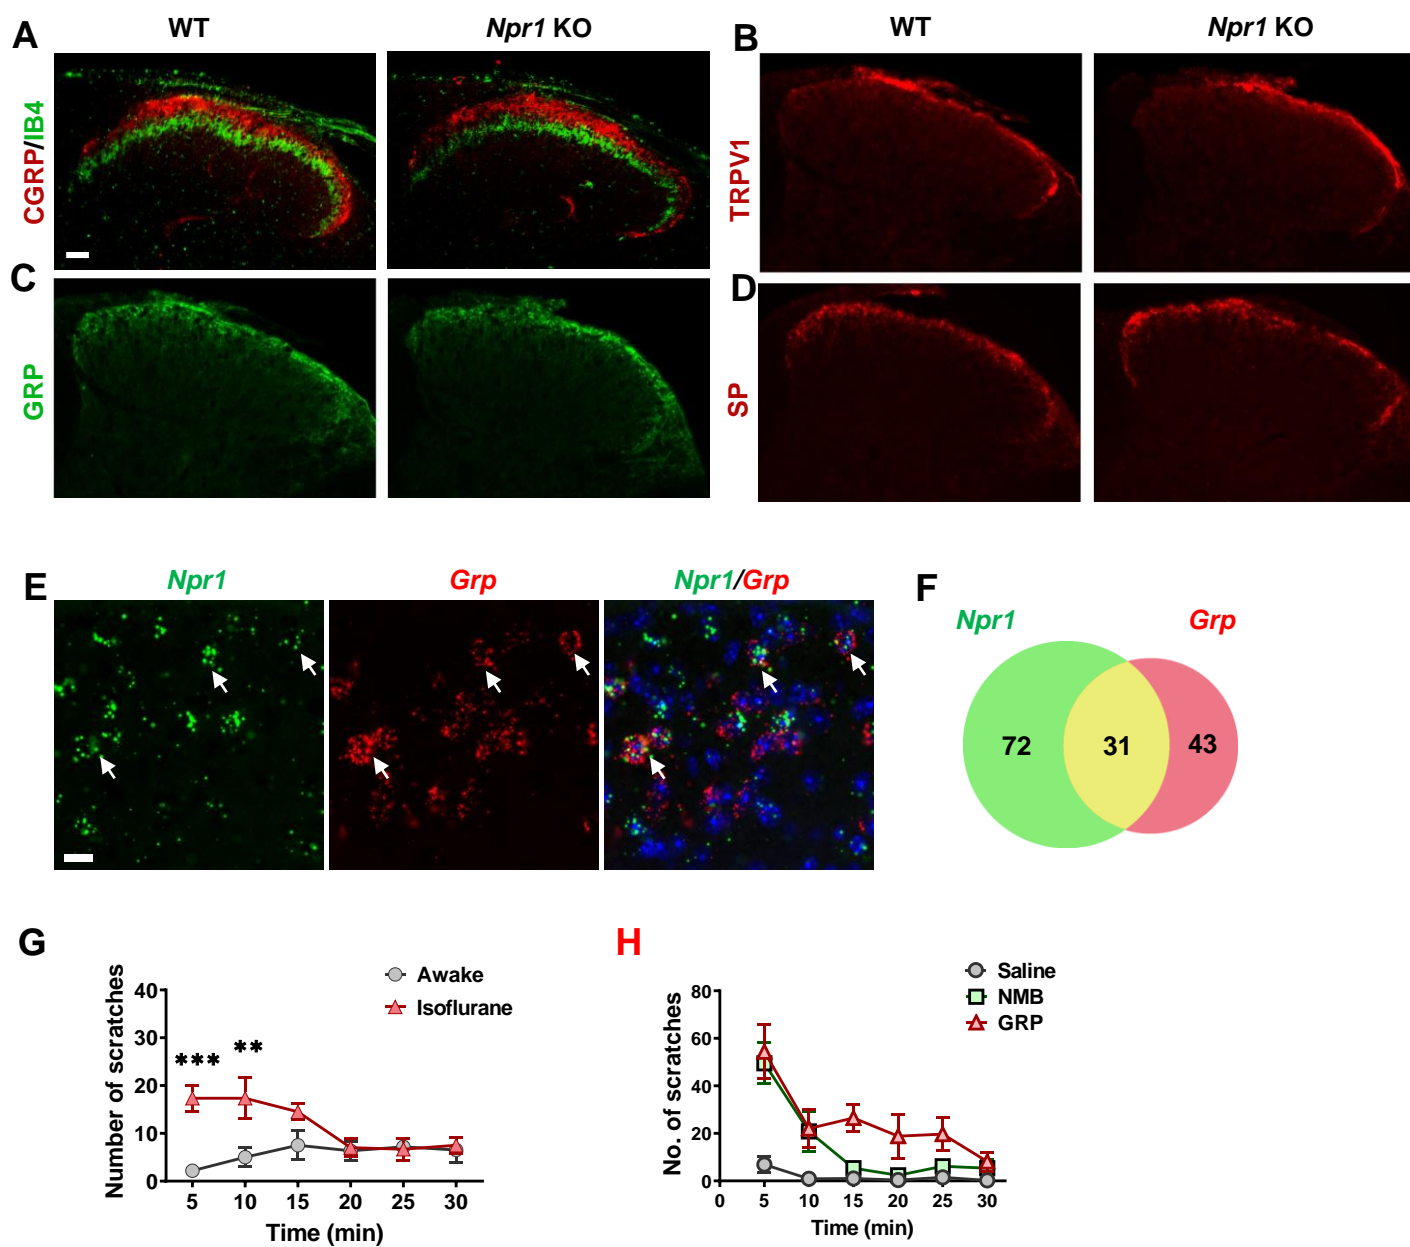

**Figure 1-figure supplement 2: Normal innervation of primary afferents in *Npr1* KO mice and WT mice. A-D, Comparable expression of CGRP (red) and IB4 staining (green), TRPV1, GRP, and SP in the superficial dorsal horn of WT and *Npr1* KO mice. Scale bar, 50  $\mu$ m. E, Images of double RNAscope ISH showing that *Npr1* (green) is partially co-expressed with *Grp* (red) in the dorsal horn. Arrows indicate double-positive neurons. Scale bar, 20  $\mu$ m. F, Venn diagram showing partial overlapping of *Npr1* and *Grp* expression. G, Scratching behaviors elicited by i.t. BNP (150  $\mu$ M) were significantly enhanced by isoflurane. H, Time course of i.t. NMB (1 nmol) and GRP (1 nmol) evoked scratching behavior. n = 6. \*\* $P$  < 0.01, \*\*\* $P$  < 0.001, two-way ANOVA followed by Bonferroni's test. Values are presented as mean  $\pm$  SEM. Scale bar, 50  $\mu$ m in A-D, 20  $\mu$ m in E.**
