# Supplementary material for: BNP facilitates NMB-encoded histaminergic itch via NPRC-NMBR crosstalk
Source: eLife journal article supplement (doi:10.7554/elife.71689), 2021-12-17
Supplement: supp [file elife-71689-supp-v1.zip › elife_poa_e71689_Figure_1_figure_supplement_2_source_data_1.xlsx]

## Sheet: Sheet1
Figure 1-figure supplement 1G Scratching behaviors elicited by i.t. BNP 5 µg (equivalent to 150 µM), were significantly enhanced by isoflurane.
Time (min)		Awake								Isoflurane
5		6	0	4	2	0	1			14	21	13	29	11	16
10		8	1	13	5	1	2			12	9	15	38	17	13
15		11	5	0	1	8	20			17	15	13	21	12	9
20		2	13	7	11	0	5			2	9	3	14	9	5
25		5	6	9	5	6	12			5	12	0	1	8	14
30		7	0	2	2	12	16			11	8	9	0	11	6
Figure 1-figure supplement 1H Time course of i.t. NMB (1 nmol) and GRP (1 nmol) evoked scratching behavior.
Time (min)	NMB								GRP								Saline
5	41	24	60	50	37	85			58	59	64	0	68	80			1	1	1	0	12	21	20
10	22	5	25	12	3	58			7	11	26	9	60	19			0	0	0	2	2	0	2
15	1	6	9	8	7	1			29	48	25	10	38	12			2	2	0	0	3	1	0
20	2	2	2	9	0	0			57	37	7	4	6	2			0	0	0	1	1	1	0
25	2	15	0	11	9	0			20	12	36	43	7	0			0	3	0	0	5	1	3
30	9	0	0	1	22	0			21	20	6	2	0	0			1	0	0	1	0	0	0
