# Supplementary material for: BNP facilitates NMB-encoded histaminergic itch via NPRC-NMBR crosstalk
Source: eLife journal article supplement (doi:10.7554/elife.71689), 2021-12-17
Supplement: supp [file elife-71689-supp-v1.zip › elife_poa_e71689_Figure_1_source_data_1.xlsx]

## Sheet: Sheet1
Figure 1B BNP dose-dependently evoked scratching behaviors 60 min after i.t. injection.
	Saline	1 µg	2.5 µg	5 µg
	4	29	54	23
	21	9	13	135
	19	25	59	38
	2	20	101	80
	17	46	72	87
	12	18	59	81
Figure 1C Time-course of scratching behaviors induced by different doses of BNP shows a delayed onset of scratching responses.
Time (min)	Saline								1 μg								2.5 μg								5 μg
10	0	0	0	1	0	0			0	1	0	0	3	0			0	0	5	0	7	3			1	3	2	26	2	0
20	0	0	0	1	3	1			6	0	5	2	0	2			2	0	1	20	4	3			1	38	1	0	7	0
30	0	3	19	0	2	4			4	0	1	0	1	1			6	3	13	2	14	14			5	8	0	1	8	20
40	2	0	0	0	7	0			6	0	9	0	9	9			22	5	15	42	14	23			15	69	21	30	22	5
50	2	0	0	0	1	7			9	7	1	16	8	0			22	0	15	17	20	9			1	15	13	17	48	24
60	0	18	0	0	4	0			4	1	9	2	25	6			2	5	10	20	13	7			0	2	1	6	0	32
