# Supplementary material for: BNP facilitates NMB-encoded histaminergic itch via NPRC-NMBR crosstalk
Source: eLife journal article supplement (doi:10.7554/elife.71689), 2021-12-17
Supplement: supp [file elife-71689-supp-v1.zip › elife_poa_e71689_Figure_2_source_data_1.xlsx]

## Sheet: Sheet1
Figure 2A Npr1 KO mice and their WT littermates showed comparable scratching behaviors in response to GRP (0.05 nmol, i.t.) and NMB (0.5 nmol, i.t.).
GRP WT	GRP NPRA KO		NMB WT	NMB NPRA KO
112	90		54	71
91	50		119	28
82	120		81	66
69	105		29	186
100	47		60	70
148	173		113	116
			176	78
			170
Figure 2B Npr1 KO mice showed significantly reduced scratching behaviors elicited by histamine (200 µg, i.d.) and CQ (200 µg, i.d.).
Histamine WT	Histamine NPRA KO		CQ WT	CQ NPRA KO
96	6		204	93
164	78		224	127
65	70		164	69
47	2		213	80
85	8		116	163
53	7		94	89
			140	80
			189	61
			160	87
			106
			128
Figure 2C Mice treated with i.t. Npr1 siRNA and Npr3 siRNA showed significantly reduced scratching responses to histamine (200 µg, i.d.,)
Control	Npr1 siRNA	Npr2 siRNA	Npr3 siRNA
60	10	45	37
93	22	37	28
69	31	71	39
41	37	55	31
58	19	60	26
42	14	94	25
	15
Figure 2D CQ (200 µg, i.d.) itch was significantly reduced in mice received Npr1 siRNA treatment.
Control	Npr1 siRNA	Npr2 siRNA	Npr3 siRNA
125	30	280	174
143	79	179	186
202	70	170	119
150	183	183	218
189	18	118	275
319	108	206	178
211	78	178
Figure 2E Real-time PCR confirmed the reduced Npr1-3 expression by siRNA knockdown targeting Npr1, Npr2, and Npr3 in the spinal cord.
	Control				Npr1 siRNA				Npr2 siRNA				Npr3 siRNA
Npr1	0.99	1.11	0.89	0.99	0.68	0.82	0.7	0.67	1.13176	0.971532	0.910322	1.16995	0.97	1.21	0.95	1.04
Npr2	1.08	1.12	0.99	1.11	1.03	0.92	0.91	1.16	0.56	0.68	0.49	0.77	0.98	1.16	0.97	1.07
Npr3	1.14	1.07	0.99	1.12	0.95	1.01	1.14	0.93	1.03176	0.921532	0.910322	1.16995	0.71	0.62	0.81	0.44
Figure 2F Real-time PCR confirmed the reduced Npr1-3 expression by siRNA knockdown targeting Npr1, Npr2, and Npr3 in DRG.
	Control				Npr1 siRNA				Npr2 siRNA				Npr3 siRNA
Npr1	1.08	1.21	0.94	0.97	0.53	0.39	0.62	0.47	1.13	1.29	0.91	0.96	1.03	1.09	0.99	1.12
Npr2	0.98	0.92	1.27	1.03	0.87	1.21	0.96	1.27	0.47	0.65	0.72	0.68	0.97	1.19	0.94	1.08
Npr3	1.24	0.93	1.19	0.82	0.97	1.18	0.93	1.13	1.14	0.98	1.21	0.93	0.71	0.44	0.69	0.52
