# Supplementary material for: BNP facilitates NMB-encoded histaminergic itch via NPRC-NMBR crosstalk
Source: eLife journal article supplement (doi:10.7554/elife.71689), 2021-12-17
Supplement: supp [file elife-71689-supp-v1.zip › elife_poa_e71689_Figure_3_source_data_1.xlsx]

## Sheet: Sheet1
Figure 3A Pre-injection of BNP (30 µM, i.t.) for 1 min significantly enhanced scratching behavior evoked by i.d. injection of histamine (Hist.) (100 µg)
Salline	Saline+Hist.	BNP+Hist.
9	9	29
14	14	36
10	10	62
6	6	17
15	15	66
14	14	45
Figure 3B Scratching behavior evoked by i.d. injection of CQ (50 µg, i.d.) was significantly enhanced by pre-injection of BNP for 1 min.
Saline	Saline+CQ	BNP+CQ
13	29	88
14	8	93
25	25	41
24	30	125
45	66	228
27	33	67
Figure 3C Co-injection of BNP (30 µM, i.t.) facilitated scratching behaviors evoked by NMB (0.05 nmol, i.t.).
Saline	Saline+NMB	BNP+NMB
21	62	86
31	82	90
19	22	55
13	44	67
14	17	72
25	50	114
Figure 3D Co-injection of BNP (30 µM, i.t.) did not facilitate scratching behaviors evoked by GRP (0.01 nmol).
Saline	Saline+GRP	BNP+GRP
32	20	80
22	40	10
21	14	9
17	20	25
12	40	34
9	33	14
Figure 3E Pre-injection of 1 µg BNP (30 µM, i.t.) for 1 min significantly enhanced scratching behavior evoked by i.d. injection of histamine (100 µg) in Grpr KO mice.
	Saline+Hist.	BNP+Hist.
	18	57
	20	34
	14	57
	18	154
	3	42
	10	68
	29	47
	14	84
Figure 3F Pre-injection of NMB (0.05 nmol, i.t.) had no effect on scratching behaviors induced by histamine.	Figure 3F Pre-injection of NMB (0.05 nmol, i.t.) had no effect on scratching behaviors induced by histamine.
	NMB+Saline	Saline+Hist.	NMB+Hist.
	3	3	11
	15	16	25
	8	5	25
	8	7	2
	3	7	2
	3	35	5
	17	12	24
	7	20	15
	6	28
Figure 3G Pre-injection of NMB (0.05 nmol, i.t.) had no effect on scratching behaviors induced by CQ.
	Saline+CQ	NMB+CQ
	40	68
	13	3
	70	8
	26	18
	12	93
	22	101
Figure 3H NPRC agonist ANP-4-23 (6 nmol, i.t.) facilitates NMB (0.005 nmol, i.t.) induced scratching behavior.
	Saline	ANP-4-23	NMB	NMB+ANP-4-23
	1	20	18	138
	4	13	7	103
	7	26	13	98
	6	46	9	96
	4	32	16	88
	16	19	10
	15	13
Figure 3I Histamine (25 µg, i.d.)-induced scratching behavior facilitated by BNP (30 µM, i.t.) was attenuated with AP 811 (10 µM, i.t.) or U 73122 (13.5 nmol, i.t.) treatment.
	Saline	BNP+Hist.	BNP+Hist.+AP 811	BNP+Hist.+U73122
	16	83	35	35
	7	96	34	26
	2	109	39	51
	4	109	34	25
	6	24	20	33
	12	62	46	38
	22	65	45	48
		109	51	36
		80		45
		61		42
		61
