# Supplementary material for: BNP facilitates NMB-encoded histaminergic itch via NPRC-NMBR crosstalk
Source: eLife journal article supplement (doi:10.7554/elife.71689), 2021-12-17
Supplement: supp [file elife-71689-supp-v1.zip › elife_poa_e71689_Figure_4_figure_supplement_1.pdf]

**Figure 4-figure supplement 1**

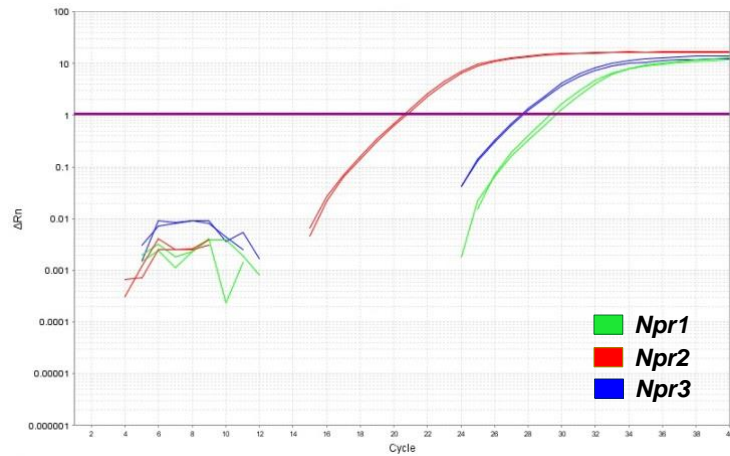

**Figure 4-figure supplement 1: real-time RT-PCR detected endogenous expression of *Npr1*, *Npr2*, and *Npr3* in HEK 293 cells.**
