# Supplementary material for: BNP facilitates NMB-encoded histaminergic itch via NPRC-NMBR crosstalk
Source: eLife journal article supplement (doi:10.7554/elife.71689), 2021-12-17
Supplement: supp [file elife-71689-supp-v1.zip › elife_poa_e71689_Figure_4_source_data_1.xlsx]

## Sheet: Sheet1
Figure 4F Quantification of intracellular calcium concentration ([Ca2+]i) shows that PTX and gallein significantly blocked the calcium release induced by BNP+NMB.
Vehicle	PTX	Galein	AP 811
90	42	61	44
250	55	17	48
144	82	30	17
210	21	26	15
90	26	22	27
90	34	30	104
Figure 4G I.t. gallein (20 nmol) significantly reduced scratching behavior evoked by histamine (25 µg, i.d.) facilitated with BNP (30 µM, i.t.).
Saline	BNP+Hist.	BNP+Hist.+Gallein
4	90	39
21	41	18
19	62	15
2	88	10
17	37	67
12	44
	57
	121
	51
	61
