# Supplementary material for: BNP facilitates NMB-encoded histaminergic itch via NPRC-NMBR crosstalk
Source: eLife journal article supplement (doi:10.7554/elife.71689), 2021-12-17
Supplement: supp [file elife-71689-supp-v1.zip › elife_poa_e71689_Figure_5_source_data_1.xlsx]

## Sheet: Sheet1
Figure 5: BNP-sap ablates spinal cord neurons expressing Npr1 and Npr3.
Figure 5F Quantified data show that BNP-sap ablated Npr1+, Npr3+, Grp+, and Nmbr+ neurons in the dorsal horn of the spinal cord, while Npr2+ neurons are not affected.
Control-Npr1	BNP-sap-Npr1		Control-Npr2	BNP-sap-Npr2		Control-Npr3	BNP-sap-Npr3		Control-Grp	BNP-sap-Grp		Control-Nmbr	BNP-sap-Nmbr
81	44		314	316		38	19		43	19.5		65	32
78	40		253	286		44	11		42.5	18.75		60	31
77	45		297	312		41	8		48.3333	24.75		65	41
91	41			288		44	17			27.2		68	36
79	30						17					73	20
72	39						11
83
102
Figure 5H Scratching behaviors induced by histamine were significantly reduced in BNP-sap treated mice.
Control	BNP-sap
68	26
90	57
171	27
111	38
66	13
82	55
36	48
75
Figure 5I Scratching behaviors induced by CQ were not significantly affected in BNP-sap treated mice.
Control	BNP-sap
289	221
200	220
111	108
168	123
135	311
219	411
218	187
228
