# Supplementary material for: BNP facilitates NMB-encoded histaminergic itch via NPRC-NMBR crosstalk
Source: eLife journal article supplement (doi:10.7554/elife.71689), 2021-12-17
Supplement: supp [file elife-71689-supp-v1.zip › elife_poa_e71689_Figure_6_figure_supplement_1_source_data_1.xlsx]

## Sheet: Sheet1
Figure 6-figure supplement 1: BNP-NPRA signaling is dispensable for chronic itch.
A, Npr1 KO mice and WT littermates showed comparable spontaneous scratching behaviors in dry skin model.
Time (day)	WT						Npr1 KO
2	17	20	10	12	16	36	35	15	11	15	3	55
4	10	4	4	6	6	48	16	15	0	13	12	11
6	17	65	20	42	18	37	14	22	9	10	18	58
8	31	196	51	9	42	72	35	71	14	80	20	60
10	71	101	85	135	52	65	39	49	40	116	31	61
B, Real-time RT PCR shows that the levels of Grp mRNA and Nmb mRNA in DRGs of dry skin mice were significantly increased comparing with WT mice.
Control Grp	Dry-skin Grp		Control Nmb	Dry-skin Nmb		Control Nppb	Dry-skin Nppb		Control Sst	Dry-skin Sst		Control Tac1	Dry-skin Tac1
0.28238	4.86268		1.13891	1.80186		0.809214	0.708539		0.349709	0.53621		0.971824	1.13535
2.53975	4.35541		0.996783	1.89128		1.07931	0.875415		3.03374	0.827813		1.03553	1.15991
1.17787	4.22379		0.963634	1.94466		1.08136	0.974616		0.394285	1.31435		1.01592	1.10051
0	5.41816		0.900675	1.87142		1.03011	1.01854		0.222262	0.58601		0.976728	1.20823
	8.50286						0.959489						1.3949
							0.928369						1.37491
E, Quantified data of RNA scope showing that the numbers of Nppb neurons and Sst neurons were significantly reduced in the DRGs of BRAFNav1.8 mice.
	Nppb			SST
	WT	BRAFNav1.8		WT	BRAFNav1.8
	45	5		60	0
	31	11		49	1
	38	4		48	2
