# Supplementary material for: BNP facilitates NMB-encoded histaminergic itch via NPRC-NMBR crosstalk
Source: eLife journal article supplement (doi:10.7554/elife.71689), 2021-12-17
Supplement: supp [file elife-71689-supp-v1.zip › elife_poa_e71689_Figure_6_source_data_1.xlsx]

## Sheet: Sheet1
Figure 6: SST evoked both pain and itch responses in mice.
Figure 6A Pre-injection of morphine (10 mg/kg, i.p.) for 30 min attenuated scratching behaviors induced by i.t. injection of SST (5 nmol).
Sal	Mor
226	116
156	89
168	97
222	150
143	78
195	63
Figure 6B SST (5 nmol, i.t.)-evoked scratching behaviors were significantly reduced in bombesin-saporin-treated mice comparing with control mice that were treated with blank saporin.
Ctrl	BB-sap
110	37
173	110
124	69
186	141
259	34
170
Figure 6C OCT-evoked scratching behaviors were significantly reduced in bombesin-saporin-treated mice comparing with control mice that were treated with blank saporin.
Time (min)	Saline							BB-sap
5	13	53	21	15	26	33		9	23	0	13	0	53
10	22	34	22	41	56	59		13	15	25	48	5	12
15	38	15	23	36	37	35		10	10	31	28	10	14
20	34	25	12	35	24	57		14	14	13	22	18	13
25	18	24	16	27	19	40		25	6	15	20	8	12
30	33	16	1	51	54	42		20	13	6	9	7	3
