# Supplementary material for: BNP facilitates NMB-encoded histaminergic itch via NPRC-NMBR crosstalk
Source: eLife journal article supplement (doi:10.7554/elife.71689), 2021-12-17
Supplement: supp [file elife-71689-supp-v1.zip › elife_poa_e71689_Figure_7_figure_supplement_1.pdf]

**Figure 7-figure supplement 1**

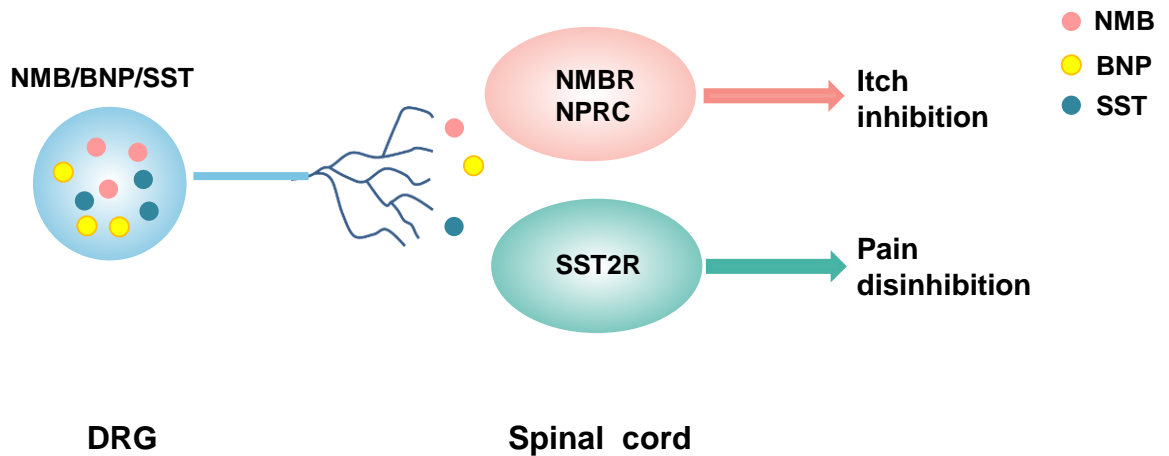

**Figure 7-figure supplement 1. A hypothetical model depicting the role of BNP, NMB and SST in facilitation of itch and disinhibition of pain, respectively.** In response to histamine injection, NMB is released from primary afferents to activate NMBR neurons, while BNP is released to activate NPRC to facilitate NMBR signaling in NMBR neurons. Note that NMB and BNP do not have to be released from the same sensory neurons since NMB is also expressed in non-BNP neurons that may also innervate NMBR/NPRC neurons. During itch transmission, SST is not released. However, in response to certain types of noxious stimuli, SST may be released due to more intense firing of primary afferents to inhibit SST2R neurons, contributing to nociceptive transmission as a result of disinhibition.
